# Supplementary material
Source: publisher figshare collection journal article supplement (https://acs.figshare.com/ndownloader/files/5456699)
Supplement: Supplementary file 5 [file 5456699]

3050 Spruce Street, Saint Louis, MO 63103, USA

Website: [www.sigmaaldrich.com](http://www.sigmaaldrich.com)Email USA: [techserv@sial.com](mailto:techserv@sial.com)Outside USA: [eurtechserv@sial.com](mailto:eurtechserv@sial.com)

## Product Specification

Product Name:  
Geldanamycin from *Streptomyces hygroscopicus* - ≥98% (HPLC), powder

Product Number: **G3381**  
CAS Number: 30562-34-6

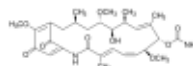

Formula: C<sub>29</sub>H<sub>40</sub>N<sub>2</sub>O<sub>9</sub>  
Formula Weight: 560.6 AMU

| TEST                           | Specification           |
|--------------------------------|-------------------------|
| Appearance (Form)              | Powder                  |
| Appearance (Colour)            | Yellow to Yellow-Orange |
| Solubility (Solvent)           | Dichloromethane         |
| Solubility (Conc)              | 4.90 - 5.10 mg/ml       |
| Solubility (Heating)           | Yes or No               |
| Solubility (Turbidity)         | Clear                   |
| Solubility (Color)             | Yellow to Yellow-Orange |
| Elemental Anal. (%C anhydrous) | 61.60 - 62.60 %         |
| Elemental Anal. (%N anhydrous) | 4.50 - 5.50 %           |
| Purity (HPLC)                  | ≥ 98.00 %               |
| NMR (Solvent)                  | CDCl <sub>3</sub>       |
| Identity by NMR                | Consistent              |
| NMR (Residual Solvent 1)       | Diethylether            |
| NMR (% Solvent 1)              | ≤ 2.00 %                |
| NMR (Residual Solvent 2)       | Dichloromethane         |
| NMR (% Solvent 2)              | ≤ 2.00 %                |
| NMR (Total % Resid.Solvents)   | ≤ 2.00 %                |
| Recommended Retest Period      | -----                   |
| 5 Years                        |                         |

Specification: PRE.0.ZQ5.10000005961

Sigma-Aldrich warrants, that at the time of the quality release or subsequent retest date this product conformed to the information contained in this publication. The current Specification sheet may be available at [Sigma-Aldrich.com](http://Sigma-Aldrich.com). For further inquiries, please contact Technical Service. Purchaser must determine the suitability of the product for its particular use. See reverse side of invoice or packing slip for additional terms and conditions of sale.
