# Supplementary material
Source: publisher figshare collection journal article supplement (https://acs.figshare.com/ndownloader/files/5456699)

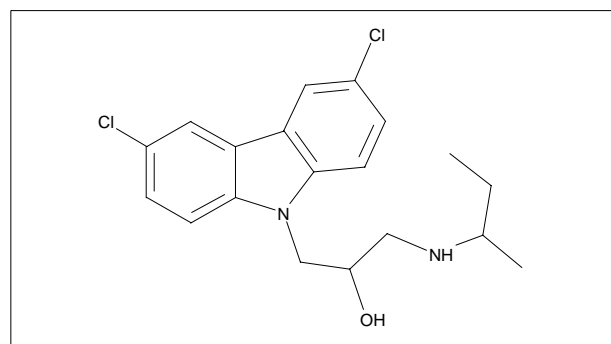

|    |         |          |                                                                  |
|----|---------|----------|------------------------------------------------------------------|
| ID | 5975761 | 365.3060 | C <sub>19</sub> H <sub>22</sub> Cl <sub>2</sub> N <sub>2</sub> O |
|----|---------|----------|------------------------------------------------------------------|

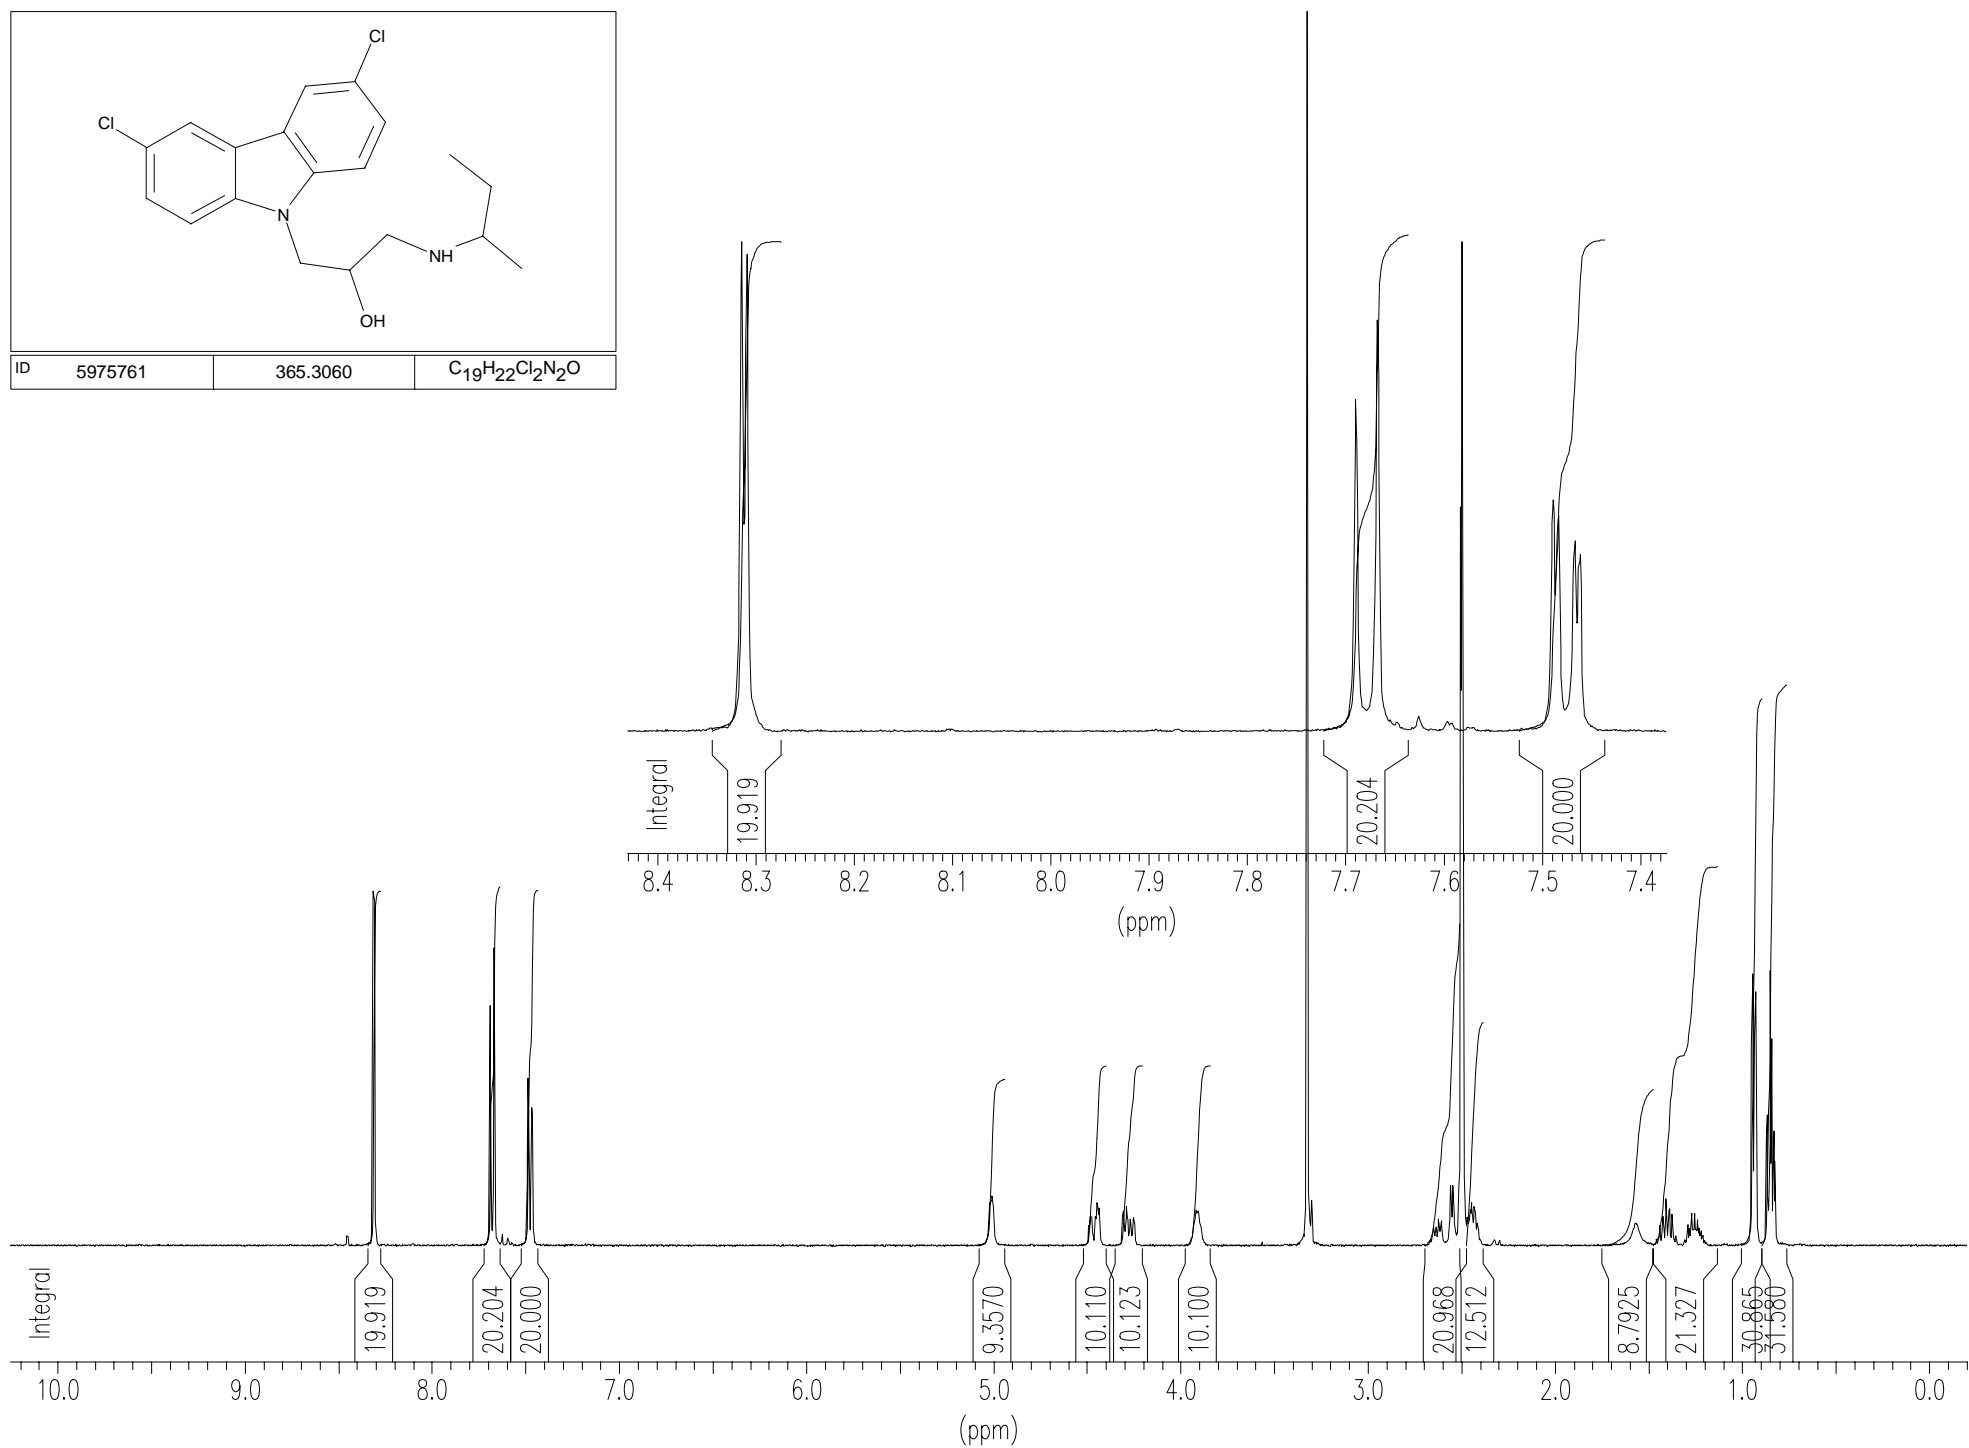

Supplement: Supplementary file 4 [file 5456699]
